# Supplementary material
Source: HighWire-hosted journal article supplement (https://jech.bmj.com/content/73/6/502)
Supplement: inline-supplementary-material-1 [file inline-supplementary-material-1.pdf]

## Supplementary tables

**Table S1: Differences in key characteristics between students completing all surveys and those completing baseline only**

|                                  |                | Complete Case   | Baseline data only | P value | Total           |
|----------------------------------|----------------|-----------------|--------------------|---------|-----------------|
| Covariate                        | Category       | N (%)<br>N=2297 | N (%)<br>N=1040    |         | N (%)<br>N=3337 |
| School size                      | Small          | 1032 (44.93)    | 542 (52.12)        | 0.12    | 1574 (47.17)    |
|                                  | Large          | 1265 (55.07)    | 498 (47.88)        |         | 1763 (52.83)    |
| School neighbourhood deprivation | Low score      | 1071 (46.63)    | 525 (50.48)        | 0.41    | 1696 (47.83)    |
|                                  | High score     | 1226 (53.37)    | 515 (49.52)        |         | 1741 (52.17)    |
| Free school meal eligibility     | Low score      | 1136 (49.46)    | 527 (50.67)        | 0.80    | 1663 (49.84)    |
|                                  | High score     | 1161 (50.54)    | 513 (49.33)        |         | 1674 (50.16)    |
| Student gender                   | Female         | 1129 (49.98)    | 515 (50.54)        | 0.86    | 1644 (50.15)    |
|                                  | Male           | 1130 (50.02)    | 504 (49.46)        |         | 1634 (49.85)    |
| Student ethnicity                | White British  | 937 (41.19)     | 446 (43.34)        | 0.55    | 1383 (41.46)    |
|                                  | Other          | 1338 (58.81)    | 583 (56.66)        |         | 1921 (58.54)    |
| Family structure                 | Two parents    | 1741 (76.13)    | 647 (62.75)        | <0.0001 | 2388 (71.97)    |
|                                  | Other          | 546 (23.87)     | 384 (37.25)        |         | 930 (28.03)     |
| Parental working                 | Not in work    | 172 (8.99)      | 115 (14.32)        | 0.0006  | 287 (10.57)     |
|                                  | In work        | 1741 (91.01)    | 688 (85.68)        |         | 2429 (89.43)    |
| Family affluence                 | Low affluence  | 823 (36.77)     | 371 (36.88)        | 0.97    | 1194 (36.81)    |
|                                  | High affluence | 1415 (63.23)    | 365 (63.12)        |         | 2050 (63.19)    |

**Table S2: Adjusted and stratified associations between school-level exposures (rigid boundaries and value-added education) and student risk behaviours, complete case analysis**

| Student risk behaviour           | Prevalence N (%) / Mean (SD) | School-level exposures |      |                                                                                  |                                                                                   |                                                                                                                                                                       |                                                                                                                   |                        |      |                                                          |                                                                                   |                                                                  |                        |
|----------------------------------|------------------------------|------------------------|------|----------------------------------------------------------------------------------|-----------------------------------------------------------------------------------|-----------------------------------------------------------------------------------------------------------------------------------------------------------------------|-------------------------------------------------------------------------------------------------------------------|------------------------|------|----------------------------------------------------------|-----------------------------------------------------------------------------------|------------------------------------------------------------------|------------------------|
|                                  |                              | Rigid boundaries       |      |                                                                                  |                                                                                   |                                                                                                                                                                       |                                                                                                                   | Value-added education  |      |                                                          |                                                                                   |                                                                  |                        |
|                                  |                              | Unadjusted association |      | Adjusted association                                                             |                                                                                   |                                                                                                                                                                       |                                                                                                                   | Unadjusted association |      | Adjusted association                                     |                                                                                   |                                                                  |                        |
|                                  |                              | Association            | P    | Potential confounders adjusted for                                               | Variables for which evidence of moderation indicates need for stratified analysis | Association – overall or stratified where evidence of moderation                                                                                                      | P                                                                                                                 | Association            | P    | Potential confounders adjusted for                       | Variables for which evidence of moderation indicates need for stratified analysis | Association – overall or stratified where evidence of moderation | P                      |
| Bullying perpetration            | 2.76 (0.26)                  | 0.87 (-0.07, 1.82)     | 0.07 | Size, deprivation, ethnicity, family structure, parent working, family affluence | Sex                                                                               | Female 0.04 (-0.68, 0.76)<br>Male 0.98 (0.26, 1.70)                                                                                                                   | Female 0.92<br>Male 0.01                                                                                          | 0.11 (-0.29, 0.5)      | 0.6  | Size, sex, deprivation, family structure, parent working | Family affluence                                                                  | Low -0.34 (-0.70-0.007)<br>High 0.19 (-0.12, 0.48)               | Low 0.056<br>High 0.21 |
| Bullying victimisation           | 0.33 (0.02)                  | 0.09 (0.02, 0.16)      | 0.01 | -                                                                                | Family affluence, sex                                                             | Low affluence female 0.10 (-0.01, 0.20)<br>Low affluence male 0.26 (0.16, 0.36)<br>High affluence female -0.04 (-0.14, 0.05)<br>High affluence male 0.11 (0.02, 0.20) | Low affluence female 0.07<br>Low affluence male <0.0001<br>High affluence female 0.35<br>High affluence male 0.02 | -0.01 (-0.04, 0.02)    | 0.53 | -                                                        | -                                                                                 | -0.01 (-0.04, 0.02)                                              | 0.53                   |
| Smoking tobacco ever             | 468 (21.1%)                  | 1.46 (0.80, 2.64)      | 0.22 | Parent working, sex                                                              | -                                                                                 | 1.47 (0.78, 2.78)                                                                                                                                                     | 0.24                                                                                                              | 0.89 (0.69, 1.16)      | 0.39 | -                                                        | Family affluence                                                                  | Low 0.70 (0.52, 0.95)<br>High 0.98 (0.75, 1.20)                  | Low 0.02<br>High 0.87  |
| Smoking tobacco in previous week | 155 (7.0%)                   | 1.44 (0.70, 2.93)      | 0.32 | Deprivation, parent working                                                      | -                                                                                 | 1.48 (0.74, 2.95)                                                                                                                                                     | 0.27                                                                                                              | 0.87 (0.63, 1.20)      | 0.39 | -                                                        | Family affluence                                                                  | Low 0.62 (0.42, 0.91)<br>High 0.99 (0.70, 1.41)                  | Low 0.02<br>High 0.98  |

|                          |             |                      |      |                        |                  |                                                       |                       |                      |      |   |   |                      |      |
|--------------------------|-------------|----------------------|------|------------------------|------------------|-------------------------------------------------------|-----------------------|----------------------|------|---|---|----------------------|------|
| Alcohol in previous week | 247 (11.1%) | 1.28<br>(0.54, 3.03) | 0.57 | Size, deprivation, FSM | -                | 1.49 (0.81, 2.76)                                     | 0.2                   | 0.93<br>(0.66, 1.32) | 0.68 | - | - | 0.93<br>(0.66, 1.32) | 0.68 |
| Really drunk ever        | 505 (22.7%) | 1.27<br>(0.55, 2.91) | 0.58 | Deprivation, size      | Family affluence | Low 0.99<br>(0.50, 1.95)<br>High 2.09<br>(1.14, 3.86) | Low 0.98<br>High 0.02 | 0.83<br>(0.58, 1.18) | 0.3  | - | - | 0.83<br>(0.58, 1.18) | 0.3  |
| Binge drinking ever      | 304 (13.6%) | 1.83<br>(0.75, 4.51) | 0.19 | Size, deprivation      | -                | 2.44 (1.33, 4.45)                                     | 0.00                  | 0.87<br>(0.59, 1.29) | 0.49 | - | - | 0.87<br>(0.59, 1.29) | 0.49 |
| Drugs ever               | 798 (35.7%) | 1.39<br>(0.91, 2.45) | 0.11 | -                      | -                | 1.49<br>(0.91, 2.45)                                  | 0.11                  | 0.89<br>(0.73, 1.10) | 0.29 | - | - | 0.89<br>(0.73, 1.10) | 0.29 |
| Drugs in previous month  | 194 (8.5%)  | 2.97<br>(1.20, 7.32) | 0.02 | Size, parent working   | -                | 2.84,<br>(1.22, 6.61)                                 | 0.02                  | 0.86<br>(0.56, 1.32) | 0.50 | - | - | 0.86<br>(0.56, 1.32) | 0.5  |

**Table S3: Adjusted and stratified associations between school-level exposures (student commitment and sense of belonging) and student risk behaviours, complete case analysis**

| Student risk behaviour           | School-level exposures |      |                                                                                 |                                                                                   |                                                                                                                                                                                                                          |                                                                                                                                                          |                        |      |                                    |                                                                                   |                                                                  |                                   |
|----------------------------------|------------------------|------|---------------------------------------------------------------------------------|-----------------------------------------------------------------------------------|--------------------------------------------------------------------------------------------------------------------------------------------------------------------------------------------------------------------------|----------------------------------------------------------------------------------------------------------------------------------------------------------|------------------------|------|------------------------------------|-----------------------------------------------------------------------------------|------------------------------------------------------------------|-----------------------------------|
|                                  | Student commitment     |      |                                                                                 |                                                                                   |                                                                                                                                                                                                                          |                                                                                                                                                          | Student belonging      |      |                                    |                                                                                   |                                                                  |                                   |
|                                  | Unadjusted association |      | Adjusted association                                                            |                                                                                   |                                                                                                                                                                                                                          |                                                                                                                                                          | Unadjusted association |      | Adjusted association               |                                                                                   |                                                                  |                                   |
|                                  | Association            | P    | Potential confounders adjusted for                                              | Variables for which evidence of moderation indicates need for stratified analysis | Association – overall or stratified where evidence of moderation                                                                                                                                                         | P                                                                                                                                                        | Association            | P    | Potential confounders adjusted for | Variables for which evidence of moderation indicates need for stratified analysis | Association – overall or stratified where evidence of moderation | P                                 |
| Bullying perpetration            | 0.42<br>(-0.53, 1.36)  | 0.39 | Size, sex, IDACI, ethnicity, family structure, parent working, family affluence |                                                                                   | -0.28<br>(-1.06, 0.05)                                                                                                                                                                                                   | 0.49                                                                                                                                                     | -0.28<br>(-0.65, 0.08) | 0.13 | Size, deprivation                  | Sex                                                                               | Female -0.06 (-0.32, 0.20)<br>Male -0.77 (-1.03, -0.48)          | Female 0.64<br>Male <0.0001       |
| Bullying victimisation           | -0.05<br>(-0.13, 0.02) | 0.14 | Parent working                                                                  | Ethnicity                                                                         | White British 0.11<br>(0.00, 0.22)<br>Other -0.14<br>(-0.21, -0.06)                                                                                                                                                      | White British 0.06<br>Other 0.00                                                                                                                         | -0.03<br>(-0.06, 0.00) | 0.07 | -                                  | Sex                                                                               | Female -0.002 (-0.37, 0.03)<br>Male -.77<br>(-1.03, -0.48)       | Female 0.91<br>Male 0.002         |
| Smoking tobacco ever             | 0.67<br>(0.36, 1.26)   | 0.21 | Deprivation, FSM, size                                                          | Family affluence                                                                  | Low affluence<br>White British 0.84<br>(0.33, 2.17)<br>Low affluence other ethnicity 0.40<br>(0.18, 0.90)<br>High affluence<br>White British 1.68<br>(0.69, 4.11)<br>High affluence other ethnicity 0.80<br>(0.36, 1.79) | Low affluence<br>White British 0.72<br>Low affluence other ethnicity 0.03<br>High affluence<br>White British 0.26<br>High affluence other ethnicity 0.59 | 0.79<br>(0.63, 1.00)   | 0.05 | -                                  | Ethnicity                                                                         | White British 0.67<br>(0.51, 0.86)<br>Other 0.88<br>(0.69, 1.13) | White British 0.002<br>Other 0.32 |
| Smoking tobacco in previous week | 0.71<br>(0.31, 1.60)   | 0.41 | Deprivation, FSM, ethnicity, parent working                                     | Family affluence, family structure                                                | Low affluence<br>two parents 0.95<br>(0.29, 3.07)                                                                                                                                                                        | Low affluence<br>two parents 0.94                                                                                                                        | 0.77<br>(0.57, 1.04)   | 0.09 | Deprivation                        | -                                                                                 | 0.69<br>(0.53, 0.91)                                             | 0.39                              |

|                          |                   |      |                                                   |                  |                                                                                                                                                                   |                                                                                                                             |                   |      |                  |                  |                                                              |                                 |
|--------------------------|-------------------|------|---------------------------------------------------|------------------|-------------------------------------------------------------------------------------------------------------------------------------------------------------------|-----------------------------------------------------------------------------------------------------------------------------|-------------------|------|------------------|------------------|--------------------------------------------------------------|---------------------------------|
|                          |                   |      |                                                   |                  | Low affluence other family structure 0.34 (0.10, 1.18)<br>High affluence two parents 3.17 (1.13, 8.90)<br>High affluence other family structure 1.15 (0.35, 3.72) | Low affluence other family structure 0.09<br>High affluence two parents 30.03<br>High affluence other family structure 0.82 |                   |      |                  |                  |                                                              |                                 |
| Alcohol in previous week | 0.43 (0.20, 0.96) | 0.04 | Size, deprivation, FSM, ethnicity, parent working | Family affluence | Low 0.31 (0.12, 0.78)<br>High 1.08 (0.51, 2.31)                                                                                                                   | Low 0.01<br>High 0.84                                                                                                       | 0.89 (0.63, 1.25) | 0.50 | -                | FSM              | Low = 1.04 (0.80, 1.36)<br>High=0.54 (0.40, 0.73)            | Low 0.77<br>High <0.0001        |
| Really drunk ever        | 0.44 (0.19, 1.00) | 0.05 | Size, deprivation, FSM, ethnicity                 | -                | 0.67 (0.32, 1.40)                                                                                                                                                 | 0.29                                                                                                                        | 0.86 (0.60, 1.23) | 0.41 | Deprivation, FSM | Family affluence | Low = 0.88 (0.66, 1.15)<br>High = 0.66 (0.52, 0.84)          | Low 0.34<br>High 0.001          |
| Binge drinking ever      | 0.41 (0.16, 1.02) | 0.06 | Size, deprivation, FSM, ethnicity                 | -                | 0.73 (0.31, 1.71)                                                                                                                                                 | 0.47                                                                                                                        | 0.83 (0.57, 1.22) | 0.35 | Deprivation      | Family structure | Two parents = 0.67 (0.50, 0.91)<br>Other = 0.96 (0.69, 1.35) | Two parents 0.009<br>Other 0.83 |
| Drugs ever               | 0.8 (0.48, 1.33)  | 0.39 | Size, deprivation, FSM, ethnicity                 | -                | 0.80 (0.46, 1.40)                                                                                                                                                 | 0.44                                                                                                                        | 0.87 (0.71, 1.05) | 0.15 | -                | -                | 0.87 (0.71, 1.05)                                            | 0.15                            |
| Drugs in previous month  | 0.73 (0.24, 2.16) | 0.56 | Size, deprivation, ethnicity, parent working, FSM | -                | 0.64 (0.21, 1.97)                                                                                                                                                 | 0.44                                                                                                                        | 0.63 (0.44, 0.90) | 0.01 | -                | -                | 0.63 (0.44, 0.90)                                            | 0.01                            |
